# Supplementary material for: A Scoping Review of Modifiable Risk Factors in Pediatric Onset Multiple Sclerosis: Building for the Future
Source: Children (Basel). 2018 Oct 26;5(11):146. doi: 10.3390/children5110146 (PMC6262383; doi:10.3390/children5110146)
Supplement: Supplementary file 1 [file children-05-00146-s001.pdf]

| Author, Year             | Purpose, Aim or Questions                                               | Study Design       | Total Sample (N) | n per group             | Age (mean and SD)                     | % Female                  | Disease Duration (mean SD, yrs) | Relevant Outcomes                                                             | Relevant Findings                                                                                                                                                                                                                                                                                                                                                                                                                                                                                                 |
|--------------------------|-------------------------------------------------------------------------|--------------------|------------------|-------------------------|---------------------------------------|---------------------------|---------------------------------|-------------------------------------------------------------------------------|-------------------------------------------------------------------------------------------------------------------------------------------------------------------------------------------------------------------------------------------------------------------------------------------------------------------------------------------------------------------------------------------------------------------------------------------------------------------------------------------------------------------|
| Pakpoor et al. 2017 [14] | To determine the association between dietary factors and POMS patients. | Case-control       | 768              | Case 312<br>Control 456 | Case 15.1 (3.3)<br>Control 14.4 (3.7) | Case 62.5<br>Control 52.9 | 10.8 (10.2)                     | 1. <b>Block Kids Food Screener (BKFS)</b><br>2. <b>BMI</b>                    | <ul style="list-style-type: none"> <li>• Covariate adjusted model (age, sex, ethnicity, race, BMI, and socioeconomic status) showed that iron levels below RDA was associated with an increased risk of POMS (odds ratio (OR) = 1.80, 95% confidence intervals (CI) 1.24-2.62, <math>p &lt; 0.01</math>).</li> <li>• Individuals with POMS had higher BMIs (M=25.3, SD 7.1) than controls (M=22.1, SD 5.7; <math>p &lt; 0.001</math>).</li> </ul>                                                                 |
| Azary et al. 2017 [21]   | To investigate the effects of diet on relapse rate in POMS youth.       | Prospective cohort | 219              | N/A                     | 15.1 (3.3)                            | 61.2                      | 0.9 (0.9)                       | 1. <b>BKFS</b><br>2. <b>Time to relapse</b> (post enrollment to end of study) | <ul style="list-style-type: none"> <li>• After adjusting for age, sex, race, ethnicity, disease duration, BMI, total energy intake, use of disease modifying therapies, and baseline vitamin D levels, only vegetable and saturated fat intake were associated with relapse risk in POMS. A 10 % increase in caloric intake of saturated fats led to a tripling of the relapse risk (adjusted hazard ratio (HR): 3.22, 95% CI 1.26 – 8.17, <math>p=0.014</math>) Whereas, the same increase in caloric</li> </ul> |

|                             |                                                                                                          |                      |     |                                                                              |                                                                                                                                      |                                                                              |              |                                                                                                                                                                                                                                                     |                                                                                                                                                                                                                                                                                                                            |
|-----------------------------|----------------------------------------------------------------------------------------------------------|----------------------|-----|------------------------------------------------------------------------------|--------------------------------------------------------------------------------------------------------------------------------------|------------------------------------------------------------------------------|--------------|-----------------------------------------------------------------------------------------------------------------------------------------------------------------------------------------------------------------------------------------------------|----------------------------------------------------------------------------------------------------------------------------------------------------------------------------------------------------------------------------------------------------------------------------------------------------------------------------|
|                             |                                                                                                          |                      |     |                                                                              |                                                                                                                                      |                                                                              |              |                                                                                                                                                                                                                                                     | intake in vegetables cut relapse risk in half (adjusted HR: 0.53, 95% CI 0.28 – 0.98, $p=0.043$ ).                                                                                                                                                                                                                         |
| McDonald et al. 2016 [26]   | To investigate the association between dietary salt intake and POMS risk.                                | Case-control         | 501 | <b>Case</b> 170<br><b>Control</b> 331                                        | <b>Case</b> 15.2 (3.5)<br><b>Control</b> 14.0 (3.7)                                                                                  | <b>Cases</b> 62.9<br><b>Control</b> 48.6                                     | 1.0 (1.2)    | 1. <b>BKFS</b>                                                                                                                                                                                                                                      | <ul style="list-style-type: none"> <li>No association was found between risk of POMS and higher salt intake (OR=1.00, 95% CI 0.98, 1.02; <math>p=0.93</math>) or excess salt intake (OR=1.05, 95% CI 0.67, 1.64; <math>p=0.84</math>).</li> </ul>                                                                          |
| Nourbakhsh et al. 2016 [25] | To determine if dietary salt intake is associated with time to relapse in individuals with POMS and CIS. | Prospective cohort   | 174 | N/A                                                                          | 15.0 (3.3)                                                                                                                           | 64.9                                                                         | Not reported | 1. <b>BKFS</b><br>2. <b>Time to relapse</b> (post enrollment to end of study)                                                                                                                                                                       | <ul style="list-style-type: none"> <li>No associations were found between sodium intake and time to next relapse. Patients with higher sodium intake had a HR of 0.69 (95% CI 0.37 to 1.30, <math>p=0.25</math>) whereas patients with low intake had an HR of 1.37 (95% CI 0.74 to 2.51, <math>p=0.32</math>).</li> </ul> |
| Brenton et al. 2014 [20]    | To determine the prevalence of vitamin D insufficiency and deficiency in POMS and adult-onset MS.        | Retrospective cohort | 116 | <b>POMS</b> 24<br><b>Young Adult-onset MS</b> 33<br><b>Adult-onset MS</b> 59 | <i>Age of onset</i><br><b>POMS</b> 14.6 range (7-17)<br><b>Young Adult-onset MS</b> 19.7 range (18-21)<br><b>Adult-onset MS</b> 28.9 | <b>POMS</b> 71<br><b>Young Adult-onset MS</b> 73<br><b>Adult-onset MS</b> 69 | Not reported | 1. <b>Levels of 25-hydroxyvitamin D3</b> : (within 12 months before or after the established diagnosis was made)<br><i>Insufficient less than 30 ng/ml; deficient less than 20 ng/ml</i><br>2. <b>BMI</b> (within a 3 month period of the vitamin D | <ul style="list-style-type: none"> <li>No differences were found between age groups, however both groups had high percentage of individuals that were vitamin D deficient (50%) and insufficient (84%).</li> </ul>                                                                                                         |

|                           |                                                                                                                |                      |     |                              |                                                         |                            |              |                                                                                                                                          |                                                                                                                                                                                                                                                                           |
|---------------------------|----------------------------------------------------------------------------------------------------------------|----------------------|-----|------------------------------|---------------------------------------------------------|----------------------------|--------------|------------------------------------------------------------------------------------------------------------------------------------------|---------------------------------------------------------------------------------------------------------------------------------------------------------------------------------------------------------------------------------------------------------------------------|
|                           |                                                                                                                |                      |     |                              | range<br>(22-57)                                        |                            |              | level draw)<br><i>Overweight: BMI<br/>above 25-30<br/>Obese: BMI<br/>above 30</i>                                                        |                                                                                                                                                                                                                                                                           |
| Yamamoto et al. 2018 [19] | To describe the POMS patient population from one center over 13 years.                                         | Retrospective cohort | 60  | N/A                          | 15.7 (2.9)                                              | 68                         | Not reported | 1. <b>Annualize relapse rate</b><br>2. <b>25(OH)-vitamin D</b><br><i>Low levels were set at below 30 ng/ml</i><br>3. <b>BMI</b>          | <ul style="list-style-type: none"> <li>• 63% of individuals with POMS in this study had low serum vitamin D levels.</li> <li>• 49% of the cohort were overweight or obese, as determined by the BMI.</li> </ul>                                                           |
| Yilmaz et al. 2017 [23]   | To describe the features of POMS youth in Turkey.                                                              | Retrospective cohort | 193 | 193                          | 13.47 (2.88)                                            | 63.7                       | Not Reported | 1. <b>Serum 25-hydroxyvitamin D levels</b>                                                                                               | <ul style="list-style-type: none"> <li>• 68% of the Turkish cohort had low serum vitamin D levels.</li> </ul>                                                                                                                                                             |
| Banwell et al. 2011 [27]  | To determine the impact of vitamin D insufficiency, at first demyelinating event, on risk of POMS development. | Prospective cohort   | 302 | <b>Case 63 Mono-ADS) 239</b> | <b>Age at onset Case 12.0 (3.8) Mono-ADS 8.85 (4.5)</b> | <b>Case 65 Mono-ADS 48</b> | Not reported | 1. <b>Serum 25-hydroxyvitamin D</b> (samples taken within 40 days of symptom onset and categorized seasonally)<br>2. <b>MS diagnosis</b> | <ul style="list-style-type: none"> <li>• Over half (68%) of the participants had serum vitamin D levels lower than 75 nmol/L.</li> <li>• A 10 nmol/L decrease in vitamin D was associated with an increased risk of POMS (HR=0·89, 95% CI 0·80–0·98, p=0.006).</li> </ul> |

|                                |                                                                                                                                          |                                           |        |                                                                                                       |                                                                             |                                       |                          |                                                                                                                                                                                         |                                                                                                                                                                                                                                                                                                                                                     |
|--------------------------------|------------------------------------------------------------------------------------------------------------------------------------------|-------------------------------------------|--------|-------------------------------------------------------------------------------------------------------|-----------------------------------------------------------------------------|---------------------------------------|--------------------------|-----------------------------------------------------------------------------------------------------------------------------------------------------------------------------------------|-----------------------------------------------------------------------------------------------------------------------------------------------------------------------------------------------------------------------------------------------------------------------------------------------------------------------------------------------------|
| Mowry et al. 2010 [28]         | To investigate if vitamin D status, is associated with relapse rate in POMS.                                                             | Prospective cohort                        | 110    | N/A                                                                                                   | 15.0 (3.0)                                                                  | 65%                                   | Mean: 1<br>IQR (0.1-8.3) | 1. <b>Relapse rate</b> (number of relapses from blood draw to last follow-up)<br>2. <b>Serum 25-hydroxyvitamin D</b> (samples were deseasonalized and stratified by race and ethnicity) | After adjusting for race, season and ethnicity, baseline vitamin D status was associated with a 33% increase in risk of relapse with each 10 ng/ml decrease (incidence rate ratio 0.66, 95% CI 0.46 – 0.95, $p=0.02$ ).                                                                                                                             |
| Graves et al. 2016 [30]        | To determine if genetic ancestry, sex, HLA-DRB1*14, vitamin D levels, and non-HLA GRS are associated with rate of relapse in POMS youth. | Prospective cohort                        | 181    | N/A                                                                                                   | <i>Age at onset</i><br>13.1 (4.2)                                           | 65.8                                  | Not reported             | 1. <b>Levels of 25-hydroxyvitamin D3</b> (baseline serum samples)<br>2. <b>Annualized relapse rate</b><br>3. <b>HLA-DRB1*15.01 or 15.03</b> (Presence)                                  | <ul style="list-style-type: none"> <li>A 10ng/ml higher level of vitamin D only led to decreased relapse risk if individuals had at least one copy of either identified allele (HR = 0.73, 95% CI = 0.60–0.89, <math>p=0.001</math>), while adjusting for DMT and sex.</li> </ul>                                                                   |
| Gianfrancesco et al. 2017 [18] | To estimate the causal association between low serum vitamin D levels, high BMI, and POMS using genetic risk scores.                     | Case-control with mendelian randomization | 16,820 | <b>US Case</b> 394<br><b>US Control</b> 10875<br><b>Sweden Case</b> 175<br><b>Sweden control</b> 5376 | <i>Age at Onset</i><br><b>USA</b> 14.05 (3.3)<br><b>Sweden</b> 14.91 (2.67) | <b>USA</b> 75.0<br><b>Sweden</b> 71.4 | Not reported             | 1. <b>Vitamin D</b> Genetic Risk Factor (GRS)<br>2. <b>BMI</b> GRS                                                                                                                      | <ul style="list-style-type: none"> <li>SNPs that were associated with higher levels of serum vitamin D were associated with a reduced risk of POMS (OR 0.72 95% CI 0.55-0.9, <math>p=0.02</math>).</li> <li>SNPs associated with obesity were associated with increased risk of POMS (OR: 1.17, 95% CI 1.05, 1.30; <math>p=0.01</math>).</li> </ul> |

|                           |                                                                                                                                                               |                      |     |                                           |                                                             |                                           |                           |                                                                                                                                                                                                                     |                                                                                                                                                                                                                                                                                                                                                                                                                                                                                                                                                                                                                                                                                                                  |
|---------------------------|---------------------------------------------------------------------------------------------------------------------------------------------------------------|----------------------|-----|-------------------------------------------|-------------------------------------------------------------|-------------------------------------------|---------------------------|---------------------------------------------------------------------------------------------------------------------------------------------------------------------------------------------------------------------|------------------------------------------------------------------------------------------------------------------------------------------------------------------------------------------------------------------------------------------------------------------------------------------------------------------------------------------------------------------------------------------------------------------------------------------------------------------------------------------------------------------------------------------------------------------------------------------------------------------------------------------------------------------------------------------------------------------|
|                           |                                                                                                                                                               |                      |     |                                           |                                                             |                                           |                           |                                                                                                                                                                                                                     | <ul style="list-style-type: none"> <li>• BMI and vitamin D levels act independently to alter disease risk in POMS.</li> </ul>                                                                                                                                                                                                                                                                                                                                                                                                                                                                                                                                                                                    |
| Mowry et al. 2011 [29]    | To investigate if vitamin D status is associated with antibody levels to common childhood viruses and whether these associations differ based on POMS status. | Retrospective cohort | 140 | <b>POMS</b><br>120<br><b>CIS</b><br>20    | <b>POMS</b><br>15.0 (3.5)<br><b>CIS</b><br>13.8 (3.9)       | <b>POMS</b><br>63<br><b>CIS</b><br>60     | Mean:1.2<br>IQR (0.1-8.3) | 1. <b>Levels of 25-hydroxyvitamin D3</b> in baseline serum samples<br>2. <b>Viral assays</b><br>Batched EBV viral capsid antigen (VCA), cytomegalovirus (CMV), and herpes simplex virus (HSV)-1 and -2 assays (IgG) | <ul style="list-style-type: none"> <li>• POMS/CIS individuals with vitamin D sufficiency (over 30 ng/mL), had higher antibody levels to Epstein-Barr nuclear antigen-1 (coefficient=0.49, 95% CI 0.02, 0.97, <math>p=0.043</math>) than controls. This sufficiency was also associated with higher CMV antibody levels in POMS/CIS subjects (coefficient 1.04, 95% CI 0.36, 1.73, <math>p=0.004</math>) but lower CMV antibody levels in controls (coefficient -1.10, 95% CI -2.44, 0.25, <math>p=0.11</math>).</li> <li>• Higher vitamin D levels were also associated with higher titers to HSV-2 in MS/ CIS patients (coefficient 0.05, 95% CI 0.01, 0.09, <math>p=0.030</math>) but not controls.</li> </ul> |
| Tremlett et al. 2016 [33] | To explore the gut microbiota in early onset POMS compared to controls.                                                                                       | Case-control         | 35  | <b>Case</b><br>18<br><b>Control</b><br>17 | <b>Case</b><br>12.5 (4.44)<br><b>Control</b><br>13.5 (3.08) | <b>Case</b><br>56<br><b>Control</b><br>53 | 10.6 months (6.34)        | 1. <b>Alpha diversity</b><br>expressed as evenness, richness and faith phylogenetic diversity metric<br>2. <b>Beta diversity</b><br>measured using                                                                  | <ul style="list-style-type: none"> <li>• Significant differences were found at the levels of the phylum.</li> <li>• MS cases had a significant enrichment in relative abundance for members of the <i>Desulfovibrionaceae</i> and depletion in</li> </ul>                                                                                                                                                                                                                                                                                                                                                                                                                                                        |

|                           |                                                                                                                                         |                    |    |                      |                                         |                     |                               |                                                                                                                                                                        |                                                                                                                                                                                                                                                                                                                                                                                                                                                                                                                                                                                              |
|---------------------------|-----------------------------------------------------------------------------------------------------------------------------------------|--------------------|----|----------------------|-----------------------------------------|---------------------|-------------------------------|------------------------------------------------------------------------------------------------------------------------------------------------------------------------|----------------------------------------------------------------------------------------------------------------------------------------------------------------------------------------------------------------------------------------------------------------------------------------------------------------------------------------------------------------------------------------------------------------------------------------------------------------------------------------------------------------------------------------------------------------------------------------------|
|                           |                                                                                                                                         |                    |    |                      |                                         |                     |                               | Canberra distance matrix                                                                                                                                               | <i>Lachnospiraceae</i> and <i>Ruminococcaceae</i> (all P and q < 0.000005). Microbial genes involved in glutathione metabolic pathway were more abundant in cases versus controls (Mann-Whitney, $p=0.017$ ).                                                                                                                                                                                                                                                                                                                                                                                |
| Tremlett et al. 2016 [31] | To explore the association between gut microbiota in early POMS and relapse risk.                                                       | Prospective cohort | 17 | 17                   | 12.5 (4.57)                             | 59%                 | 10.3 months (6.6)             | <p>1. <b>Relapse rate</b> - (determined via structured forms and chart review by abstractors)</p> <p>2. <b>Gut Microbiome Profiles</b></p>                             | <ul style="list-style-type: none"> <li>• Low levels or an absence of <i>Fusobacteria</i> (<math>p=0.001</math>, log-rank test), higher levels of <i>Firmicutes</i> (<math>p=0.003</math>), and a presence of <i>Archaea Euyarchaeota</i> (<math>p=0.037</math>) were associated with a shorter time to relapse.</li> <li>• Absence of <i>Fusobacteria</i> was associated with a 76% (95% CI: 55%-90%) risk of an earlier relapse (HR=3.2, 95% CI; 1.2-9, <math>p = 0.024</math>), which remained significant after covariate adjustment (age and immunomodulatory drug exposure).</li> </ul> |
| Tremlett et al. 2016 [32] | To explore associations between the gut microbiota and blood immunological markers POMS cases early in their disease course compared to | Case-control       | 24 | Case 15<br>Control 9 | Case 11.9 (4.64)<br>Control 13.8 (3.19) | MS 53<br>Control 78 | 10.0 months range 2–23 months | <p>1. <b>Microbiota Diversity</b></p> <p>2. <b>Phylum level abundances</b></p> <p>3. <b>Immune markers</b></p> <p><i>Treg frequency and intracellular cytokine</i></p> | <ul style="list-style-type: none"> <li>• Measurable differences were found between blood immune host markers and gut microbiota between cases and controls.</li> </ul>                                                                                                                                                                                                                                                                                                                                                                                                                       |

|                               |                                                                                                                 |              |        |                                          |                                                                               |                                         |                   |                                                                                                                                                                                     |                                                                                                                                                                                                                                                                                                                                                                                                                                                                                                                                                                             |
|-------------------------------|-----------------------------------------------------------------------------------------------------------------|--------------|--------|------------------------------------------|-------------------------------------------------------------------------------|-----------------------------------------|-------------------|-------------------------------------------------------------------------------------------------------------------------------------------------------------------------------------|-----------------------------------------------------------------------------------------------------------------------------------------------------------------------------------------------------------------------------------------------------------------------------------------------------------------------------------------------------------------------------------------------------------------------------------------------------------------------------------------------------------------------------------------------------------------------------|
|                               | healthy controls.                                                                                               |              |        |                                          |                                                                               |                                         |                   | <i>production by T-cell</i>                                                                                                                                                         |                                                                                                                                                                                                                                                                                                                                                                                                                                                                                                                                                                             |
| Langer-Gould et al. 2013 [34] | To examine if childhood obesity is associated with the risk of developing POMS or CIS.                          | Case-control | 913172 | <b>Case</b> 75<br><b>Control</b> 913,097 | <b>Case</b> 2-11 28%<br>12-18 72%<br><b>Control</b> 2-11 49.1%<br>12-18 50.0% | <b>Case</b> 54.7<br><b>Control</b> 49.7 | Not reported      | <b>1. BMI</b><br><i>WHO definition for weight classes</i>                                                                                                                           | <ul style="list-style-type: none"> <li>• 50.7% of cases were overweight or obese.</li> <li>• Increased BMI was associated with increased risk of POMS/CIS in girls (OR = 3.76, 95% CI = 1.54 - 9.16, <math>p &lt; 0.005</math>) but not boys.</li> </ul>                                                                                                                                                                                                                                                                                                                    |
| Chitnis et al. 2016 [35]      | To determine the relative contributions of BMI and pubertal measures for risk and age of onset of pediatric MS. | Case-control | 674    | <b>Case</b> 254<br><b>Control</b> 420    | <b>Case</b> 14 (3.4)<br><b>Control</b> 14 (3.7)                               | <b>Case</b> 63<br><b>Control</b> 49     | Less than 4 years | <b>1. BMI</b><br>(within 1 year of MS onset)<br><i>Obesity defined as BMI above the 85th or 95th percentiles for age.</i><br><b>2. Sexual maturity measurements: Tanner Staging</b> | <ul style="list-style-type: none"> <li>• Increased BMI was associated with increased risk of POMS in post-pubertal girls (adjusted OR = 1.60, 95% CI: 1.12–2.27, <math>p=0.009</math>) but not in pre-pubertal girls.</li> <li>• Sample size was insufficient to assess pre- and post-pubertal boys separately, but assessed together, high BMI also increased risk of POMS (adjusted OR = 1.43, 95% CI 1.08–1.88, <math>p=0.011</math>).</li> <li>• Age of onset was 0.91 years earlier in overweight or obese girls (95% CI: 0.14–1.67, <math>p=0.022</math>).</li> </ul> |

|                               |                                                                                                                                                                                           |                        |     |                                                                  |                                                                                                                 |                                                                  |                                                                                           |                                                                                                                                                                                                                                                                                                                                                                            |                                                                                                                                                                                                                                                                                                                                                                                                                                                                                                                                                                                                                 |
|-------------------------------|-------------------------------------------------------------------------------------------------------------------------------------------------------------------------------------------|------------------------|-----|------------------------------------------------------------------|-----------------------------------------------------------------------------------------------------------------|------------------------------------------------------------------|-------------------------------------------------------------------------------------------|----------------------------------------------------------------------------------------------------------------------------------------------------------------------------------------------------------------------------------------------------------------------------------------------------------------------------------------------------------------------------|-----------------------------------------------------------------------------------------------------------------------------------------------------------------------------------------------------------------------------------------------------------------------------------------------------------------------------------------------------------------------------------------------------------------------------------------------------------------------------------------------------------------------------------------------------------------------------------------------------------------|
| Grover et al.<br>2015<br>[38] | To examine the association between physical activity (PA) and MS disease activity, depression, and fatigue in children with MS and monophasic acquired demyelinating syndrome (mono-ADS). | Cross-sectional cohort | 110 | <b>Case</b><br>31<br><b>Mono-ADS</b><br>79                       | <b>Case</b><br>15.91<br>(2.36)<br><b>Mono-ADS</b><br>13.91<br>(4.43)                                            | <b>Case</b><br>81<br><b>Mono-ADS</b><br>54                       | <i>Median (IQR)</i><br><b>Case</b><br>1.64<br>(4.22)<br><b>Mono-ADS</b><br>3.06<br>(5.03) | <b>1. Annualized relapse rate</b><br><b>2. Fatigue</b><br>Varni PedsOL multidimensional fatigue scale (PedsQL MFS)<br><b>3. Depression</b><br>Centre for Epidemiological studies of Depression Scale for Children (CES-DC)<br><b>4. Physical activity</b><br>Godin Leisure-Time Exercise Questionnaire (GLTEQ)<br><b>5. Disease burden</b><br>T1 and T2 lesion load on MRI | <ul style="list-style-type: none"> <li>• POMS youth engage in less strenuous physical activity (median 0.0, IQR 27.0) than mono-ADS patients (median 27.0, IQR 36.0; <math>p=0.0012</math>).</li> <li>• Only 45.2% of POMS patients participated in strenuous activity as compared to those with Mono-ADS ADS (82.3%, <math>p=0.0003</math>).</li> <li>• PA levels were negatively correlated with depression and fatigue.</li> <li>• Higher strenuous PA was correlated with lower T2 lesion load (<math>r=-0.66</math>, <math>p=0.006</math>) and ARR (<math>r=-.66</math>, <math>p=0.006</math>).</li> </ul> |
| Grover et al.<br>2016<br>[39] | To examine PA levels in youth with POMS and mono-ADS, compared with healthy controls and to determine factors that lead to engaging in PA.                                                | Case control           | 106 | <b>MS</b><br>27<br><b>Mono-ADS</b><br>41<br><b>Control</b><br>37 | <i>Median (IQR)</i><br><b>MS</b><br>16.0 (4.0)<br><b>Mono-ADS</b><br>14.0 (4.0)<br><b>Control</b><br>15.0 (3.0) | <b>MS</b><br>67<br><b>Mono-ADS</b><br>46<br><b>Control</b><br>68 | <i>Median (IQR)</i><br><b>MS</b><br>2.0 (2.0)<br><b>Mono-ADS</b><br>4.0 (7.0)             | <b>1. Physical Activity</b><br>GLTEQ<br><b>2. Fatigue</b><br>PedsQL MFS<br><b>3. Depression</b><br>CES-DC<br><b>4. Self-efficacy</b><br>Physical Activity Self-Efficacy Scale (PASES)<br><b>5. Goal Setting</b><br>The Exercise Goal-Setting                                                                                                                               | <ul style="list-style-type: none"> <li>• PA goal setting was associated with engagement in vigorous PA, as assessed by accelerometry (<math>p=0.0003</math>), GLTEQ (<math>p=0.006</math>) in POMS patients.</li> <li>• PA self-efficacy was associated with engagement in vigorous PA, as assessed by accelerometry (<math>p=0.02</math>) in POMS patients.</li> <li>• POMS patients engaged in less moderate (<math>p=0.009</math>)</li> </ul>                                                                                                                                                                |

|                                    |                                                                                       |                 |    |                                     |                                                                              |                                         |                                                                               |                                                                                                                             |                                                                                                                                                                                                                                                                                                                                                                                   |
|------------------------------------|---------------------------------------------------------------------------------------|-----------------|----|-------------------------------------|------------------------------------------------------------------------------|-----------------------------------------|-------------------------------------------------------------------------------|-----------------------------------------------------------------------------------------------------------------------------|-----------------------------------------------------------------------------------------------------------------------------------------------------------------------------------------------------------------------------------------------------------------------------------------------------------------------------------------------------------------------------------|
|                                    |                                                                                       |                 |    |                                     |                                                                              |                                         |                                                                               | Scale (EGS)<br><b>6. Sports Participation</b><br>short questions about sport engagement                                     | and strenuous ( $p= 0.048$ ) PA than patients with mono-ADS and healthy controls.<br><ul style="list-style-type: none"> <li>• A lower proportion of POMS patients (65%) participated in strenuous activity than did the other two groups (85-89%; <math>p= 0.02</math>)</li> <li>• PASES and EGS were positively associated with PA levels</li> </ul>                             |
| Kinnett-Hopkins et al. 2016 [40]   | To examine the validity of GLTEQ as a measure of PA in POMS.                          | Validity study  | 72 | <b>Case</b> 27<br><b>Control</b> 45 | <i>Median (IQR)</i><br><b>Case</b> 15.73 (3.2)<br><b>Control</b> 14.76 (3.8) | <b>Case</b> 66.7<br><b>Control</b> 66.7 | <i>Median (IQR)</i> 2.03 (2)                                                  | <b>1. Physical activity</b><br>GLTEQ and accelerometer data                                                                 | <ul style="list-style-type: none"> <li>• A strong correlation was found between GLTEQ and accelerometer for measuring physical activity in individuals with POMS. This positive correlation reached significance for vigorous PA (<math>r=0.736</math>, <math>p=0.001</math>), and nearly met significance from moderate (<math>r=0.319</math>, <math>p=0.053</math>).</li> </ul> |
| Toussaint-Duyster et al. 2017 [22] | To examine the interaction between exercise capacity, motor performance, neurological | Cross-sectional | 38 | <b>MS</b> 22<br><b>Post-ADEM</b> 16 | <i>Median (IQR)</i><br><b>MS</b> 14 (13-15)<br><b>Post-ADEM</b>              | <b>MS</b> 82<br><b>Post-ADEM</b> 44     | <i>Median (IQR) (months)</i><br><b>MS</b> 10.2 (4.6-21.5)<br><b>Post-ADEM</b> | <b>1. Fatigue</b><br>PedsQL MFS<br><b>2. Exercise Capacity</b><br>Bruce protocol<br><b>3. Motor performance</b><br>Movement | <ul style="list-style-type: none"> <li>• Findings showed a decrease in exercise capacity (Mean SDS= <math>-1.37</math> (1.09), <math>p &lt; 0.001</math>) and motor skills of POMS patients (Mean SDS= 13 (35.1), <math>p &lt; 0.001</math>), particularly in balance</li> </ul>                                                                                                  |

|                          |                                                                                                                              |                                                                              |     |                                                                           |                                                                                                          |                                                                     |                                     |                                                                                                                                                                                                                                           |                                                                                                                                                                                                                                                                       |
|--------------------------|------------------------------------------------------------------------------------------------------------------------------|------------------------------------------------------------------------------|-----|---------------------------------------------------------------------------|----------------------------------------------------------------------------------------------------------|---------------------------------------------------------------------|-------------------------------------|-------------------------------------------------------------------------------------------------------------------------------------------------------------------------------------------------------------------------------------------|-----------------------------------------------------------------------------------------------------------------------------------------------------------------------------------------------------------------------------------------------------------------------|
|                          | status, fatigue and health related quality of life in youth with MS and post-ADEM.                                           |                                                                              |     |                                                                           | 4.5 (2.3-5.9)                                                                                            |                                                                     | 40.1 (11.4-63.5)                    | Assessment Battery for Children second edition (MABCII)<br>4. <b>Health-related quality of life</b><br>Pediatric quality of life inventory 4.0 (PedsQl-HRQoL)                                                                             | subscales (Mean SDS= 12 (32.4), $p < 0.001$ ).<br>• Further, decreased exercise capacity was correlated with decreased participation in organized sports ( $r = 0.365$ , $p=0.034$ ).                                                                                 |
| Zafar et al. 2012 [48]   | To examine if POMS patients have more sleep disturbances, fatigue, and daytime sleepiness compared to controls.              | Case-control                                                                 | 132 | <b>Case</b> 30<br><b>Matched Control</b> 52<br><b>Historic Control</b> 52 | <b>Case</b> 16.10 (1.37)<br><b>Matched Control</b> 16.10 (1.71)<br><b>Historic Control</b> 10.40 (14.45) | <b>Case</b> 73<br><b>M Control</b> 65<br><b>Historic Control</b> 77 | 2.6 (2.4)                           | 1. <b>Fatigue</b><br>PedsQL MFS<br>2. <b>Sleep quality</b><br>Adolescent Sleep-Wake Scale (ASWS)<br>2. <b>Sleep hygiene</b><br>Adolescent Sleep Hygiene Scale<br>3. <b>Daytime sleepiness</b><br>Modified Epworth Sleepiness Scale (mESS) | • Individuals with POMS were found to have better sleep hygiene, particularly in relation to sleep stability ( $p=0.0052$ ), greater frequency of adherence to a usual sleep time throughout the week, and also less daytime sleepiness than controls ( $p=0.0061$ ). |
| Carroll et al. 2016 [49] | To explore experiences of fatigue in paediatric MS and gain insight into how POMS youth and their parents deal with fatigue. | Qualitative methods were employed using in-depth semi-structured interviews. | 28  | <b>POMS</b> 15<br><b>Parents of POMS youth</b> 13                         | <i>Median (range)</i><br><b>POMS</b> 15.2 (9-18)<br><b>Parents of POMS youth</b> 46.8 (32-52)            | <b>POMS</b> 53<br><b>Parents of POMS youth</b> 85                   | <i>Median (range)</i><br>2.9 (1-11) | Experience of fatigue and how it relates to sleep patterns.                                                                                                                                                                               | • Children with POMS reported that daytime fatigue often led to napping, which disrupted their sleep patterns and led to poor sleep quality.                                                                                                                          |
